# Supplementary material for: Nanoparticle Metrology of Silicates Using Time-Resolved Multiplexed Dye Fluorescence Anisotropy, Small Angle X-ray Scattering, and Molecular Dynamics Simulations
Source: MDPI journal article supplement (doi:10.3390/ma17071686), 2024-04-07
Supplement: s1 [file s1]

# Nanoparticle Metrology of Silicates Using Time-Resolved Multiplexed Dye Fluorescence Anisotropy, Small Angle X-ray Scattering, and Molecular Dynamics Simulations

Daniel Doveiko <sup>1,\*</sup>, Alan R. G. Martin <sup>2</sup>, Vladislav Vyshemirsky <sup>3</sup>, Simon Stebbing <sup>4</sup>, Karina Kubiak-Ossowska <sup>5</sup>, Olaf Rolinski <sup>1</sup>, David J. S. Birch <sup>1</sup> and Yu Chen <sup>1,\*</sup>

<sup>1</sup> Photophysics Group, Department of Physics, University of Strathclyde, Scottish Universities Physics Alliance, Glasgow G4 0NG, UK; djs.birch@strath.ac.uk (D.J.S.B.)

<sup>2</sup> EPSRC Future Continuous Manufacturing and Advanced Crystallisation National Facility, University of Strathclyde, 99 George Street, Glasgow G1 1RD, UK; alan.r.martin@strath.ac.uk

<sup>3</sup> School of Mathematics and Statistics, University of Glasgow, Glasgow G12 8QQ, UK; vladislav.vyshemirsky@glasgow.ac.uk

<sup>4</sup> PQ Silicas UK Limited, Warrington WA5 1AB, UK;

<sup>5</sup> ARCHIE-WeSt, Department of Physics, University of Strathclyde, Glasgow G4 0NG, UK;

\* Correspondence: daniel.doveiko.2018@uni.strath.ac.uk (D.D.); y.chen@strath.ac.uk (Y.C.)

## Supplementary Information

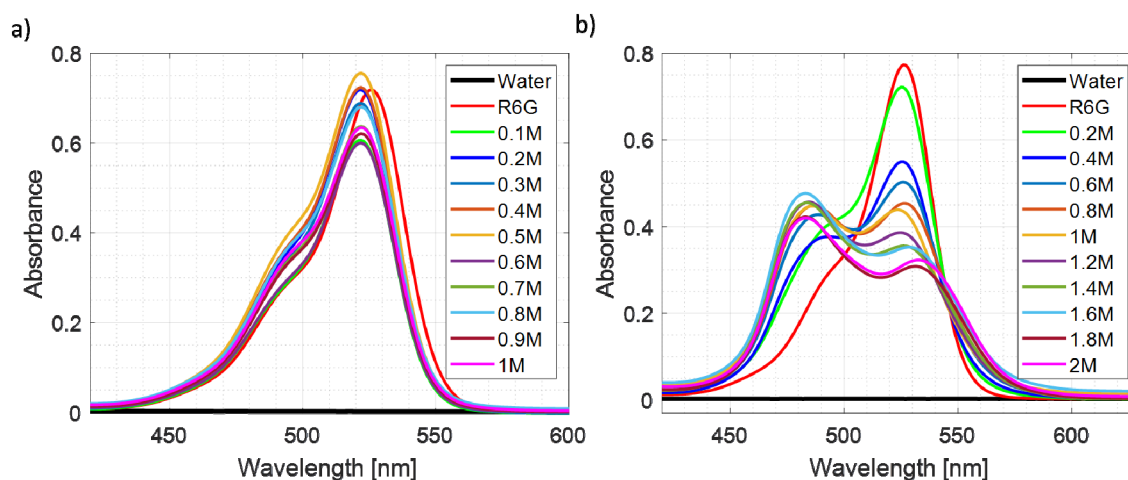

**Figure S1.** UV-Vis absorption Spectra of (a) R6G at different concentrations of NaOH; (b) R6G in Sodium silicate containing different concentrations of NaOH.

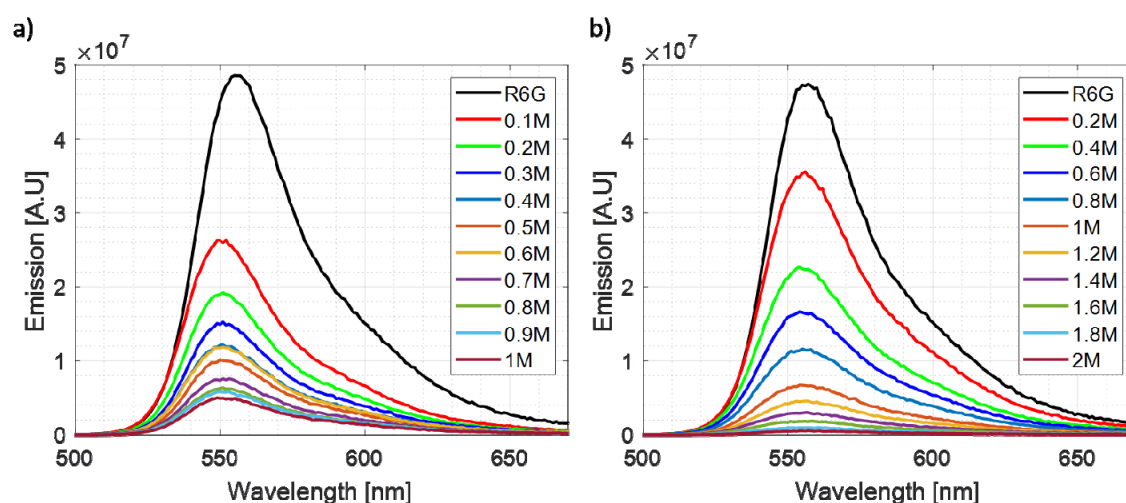

**Figure S2.** Emission Spectra ( $\lambda_{ex}=494$  nm) of (a) R6G at different concentrations of NaOH; (b) R6G in Sodium silicate containing different concentrations of NaOH.

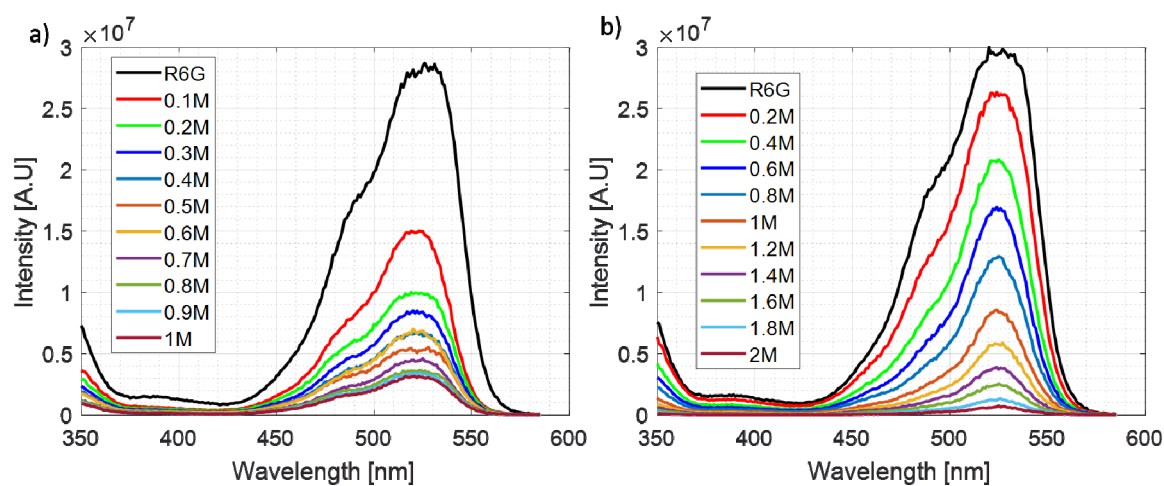

**Figure S3.** Excitation Spectra ( $\lambda_{em}=590$  nm) of (a) R6G at different concentrations of NaOH; (b) R6G in Sodium silicate containing different concentrations of NaOH.

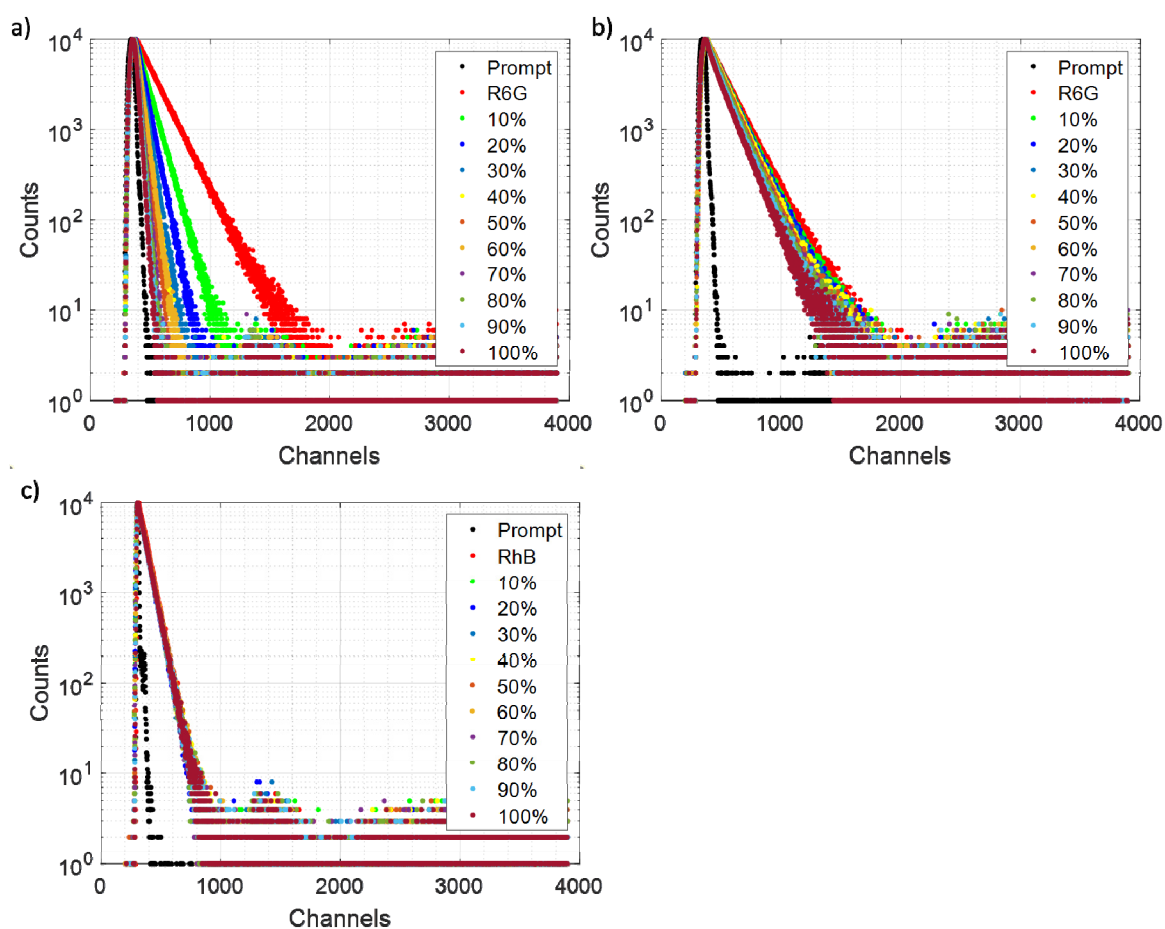

**Figure S4.** Fluorescence intensity decays of (a) R6G in NaOH, (b) R6G-silicate complex; (c) RB in sodium silicate.

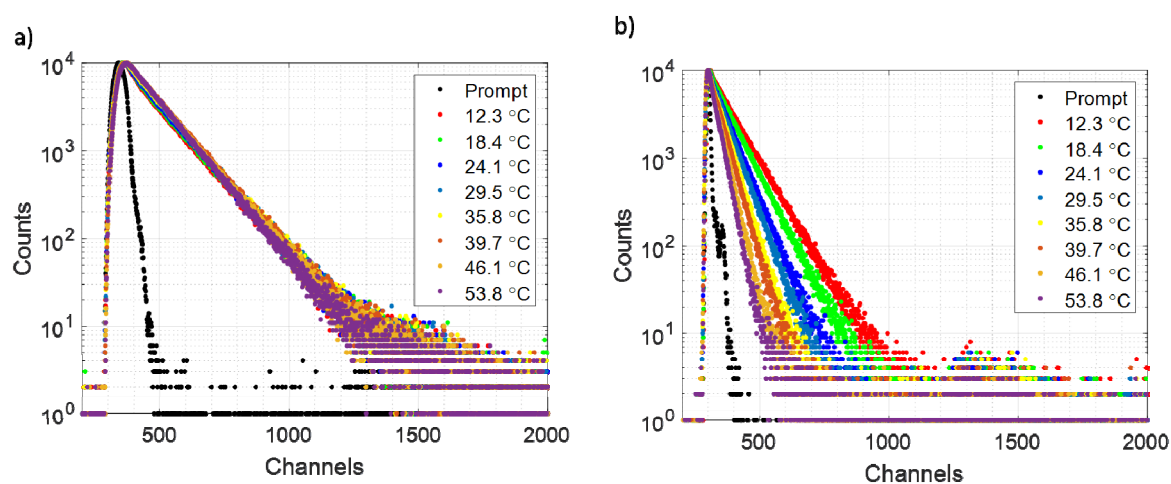

**Figure S5.** Fluorescence intensity decays at different temperatures (a) R6G-Silicate complex; (b) RB in Sodium Silicate.

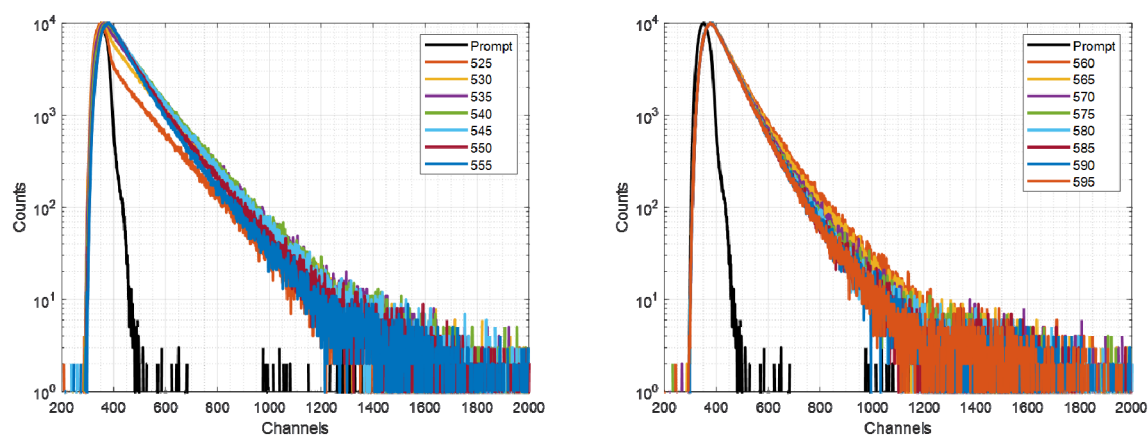

Figure S6. Fluorescence intensity decays for the multiplexed measurements.

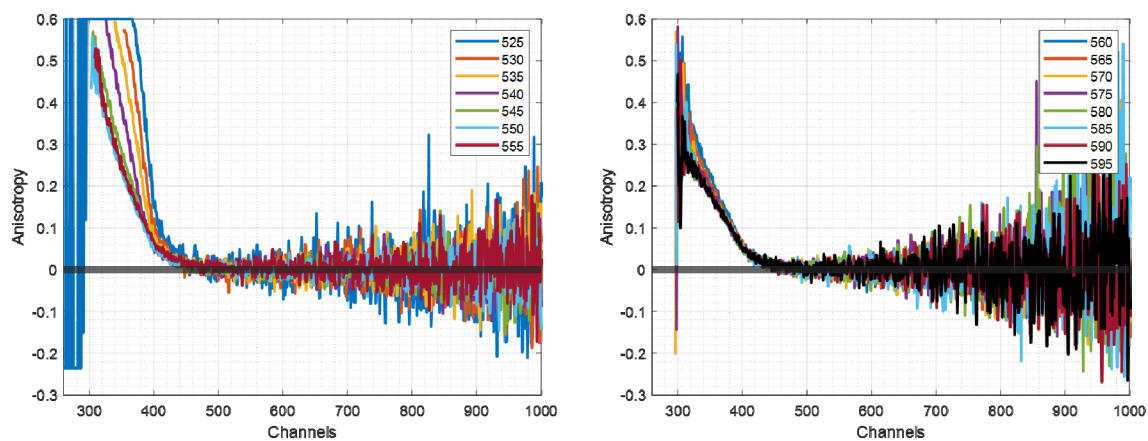

Figure S7. Anisotropy decays for the multiplexed measurements.

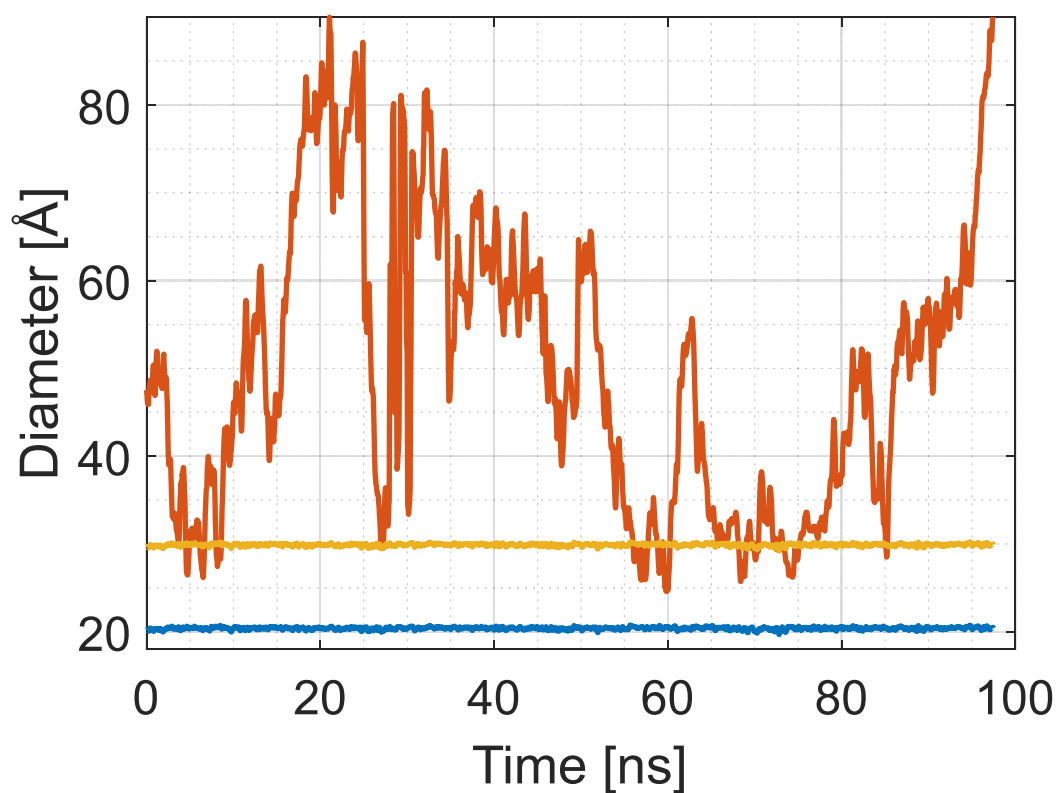

**Figure S8.** 20 Å diameter SNP measurement results. Colour code follows the one introduced on Figure 9 while the sum of separated sizes is ignored for clarity.

**Table S1.** R6G Parameters recovered from Fluorescence Intensity Decay fitting.

| SiO <sub>2</sub> (%) | [NaOH] M | T1 (ns) | B1 (%) | T2 (ns) | B2 (%) | C (%) | X <sup>2</sup> |
|----------------------|----------|---------|--------|---------|--------|-------|----------------|
| 27.0                 | 2.0      | 3.42    | 82.43  | 0.94    | 8.01   | 9.56  | 1.23           |
| 24.3                 | 1.8      | 3.46    | 88.30  | 0.79    | 5.19   | 6.50  | 1.13           |
| 21.6                 | 1.6      | 3.51    | 93.43  | 0.58    | 3.43   | 3.14  | 1.18           |
| 18.9                 | 1.4      | 3.55    | 93.06  | 0.57    | 3.59   | 3.35  | 1.12           |
| 16.2                 | 1.2      | 3.55    | 95.23  | 0.45    | 3.63   | 1.15  | 1.05           |
| 13.5                 | 1.0      | 3.65    | 94.19  | 0.59    | 2.16   | 3.65  | 1.09           |
| 10.8                 | 0.8      | 3.73    | 93.98  | 0.69    | 1.14   | 4.58  | 1.16           |
| 8.1                  | 0.6      | 3.81    | 93.39  | 1.43    | 1.66   | 4.95  | 1.19           |
| 5.4                  | 0.4      | 3.89    | 93.58  | 1.78    | 2.53   | 3.89  | 1.18           |
| 2.7                  | 0.2      | 3.98    | 95.87  | 0.61    | 1.40   | 2.73  | 1.13           |
| 0.0                  | 0.0      | 4.18    | 97.20  | -       | -      | 2.80  | 1.07           |

**Table S2.** RhB Parameters recovered from Fluorescence Intensity Decay Fitting.

| SiO <sub>2</sub> (%) | [NaOH] M | T1 (ns) | B1 (%) | T2 (ns) | B2 (%) | C (%) | χ <sup>2</sup> |
|----------------------|----------|---------|--------|---------|--------|-------|----------------|
| 27.0                 | 2.0      | 1.69    | 90.62  | 0.38    | 5.62   | 3.76  | 0.97           |
| 24.3                 | 1.8      | 1.70    | 90.25  | 0.38    | 5.94   | 3.81  | 1.08           |
| 21.6                 | 1.6      | 1.69    | 92.47  | 0.24    | 4.58   | 2.94  | 1.04           |
| 18.9                 | 1.4      | 1.69    | 91.54  | 0.31    | 5.36   | 3.09  | 0.99           |
| 16.2                 | 1.2      | 1.72    | 93.32  | 0.22    | 3.23   | 3.45  | 1.08           |
| 13.5                 | 1.0      | 1.71    | 94.33  | 0.30    | 2.12   | 3.55  | 1.04           |
| 10.8                 | 0.8      | 1.73    | 92.31  | 0.33    | 3.78   | 3.91  | 1.13           |
| 8.1                  | 0.6      | 1.69    | 93.84  | 0.16    | 2.78   | 3.38  | 1.17           |
| 5.4                  | 0.4      | 1.65    | 93.85  | 0.22    | 1.87   | 4.28  | 1.16           |
| 2.7                  | 0.2      | 1.68    | 94.49  | 0.18    | 2.03   | 3.48  | 0.97           |
| 0.0                  | 0.0      | 1.67    | 94.15  | 0.17    | 2.78   | 3.06  | 0.95           |

**Table S3.** Anisotropy Fitting Results for R6G-Silicate complex.

| SiO <sub>2</sub> (%) | [NaOH] M | Φ (ns) | R0   | χ <sup>2</sup> |
|----------------------|----------|--------|------|----------------|
| 27.0                 | 2.0      | 1.16   | 0.17 | 1.10           |
| 24.3                 | 1.8      | 0.84   | 0.13 | 1.10           |
| 21.6                 | 1.6      | 0.40   | 0.31 | 1.11           |
| 18.9                 | 1.4      | 0.44   | 0.21 | 1.05           |
| 16.2                 | 1.2      | 0.27   | 0.29 | 1.07           |
| 13.5                 | 1.0      | 0.19   | 0.33 | 1.26           |
| 10.8                 | 0.8      | 0.24   | 0.28 | 1.08           |
| 8.1                  | 0.6      | 0.17   | 0.34 | 1.18           |
| 5.4                  | 0.4      | 0.19   | 0.22 | 1.19           |
| 2.7                  | 0.2      | 0.14   | 0.35 | 1.12           |
| 0.0                  | 0.0      | 0.16   | 0.20 | 1.06           |

**Table S4.** Anisotropy Fitting Results for RhB in Sodium Silicates.

| SiO <sub>2</sub> (%) | [NaOH] M | Φ (ns) | R0   | χ <sup>2</sup> |
|----------------------|----------|--------|------|----------------|
| 27.0                 | 2.0      | 0.54   | 0.17 | 1.00           |
| 24.3                 | 1.8      | 0.46   | 0.19 | 1.00           |
| 21.6                 | 1.6      | 0.41   | 0.20 | 1.07           |
| 18.9                 | 1.4      | 0.35   | 0.20 | 0.96           |
| 16.2                 | 1.2      | 0.32   | 0.18 | 1.02           |
| 13.5                 | 1.0      | 0.40   | 0.15 | 1.14           |
| 10.8                 | 0.8      | 0.30   | 0.18 | 1.22           |
| 8.1                  | 0.6      | 0.25   | 0.21 | 1.03           |
| 5.4                  | 0.4      | 0.26   | 0.15 | 1.07           |
| 2.7                  | 0.2      | 0.22   | 0.16 | 1.19           |
| 0.0                  | 0.0      | 0.22   | 0.22 | 1.01           |

**Table S5.** R6G Parameters recovered from Fluorescence Intensity Decay fitting.

| <b>T (°C)</b> | <b>T1 (ns)</b> | <b>B1 (%)</b> | <b>T2 (ns)</b> | <b>B2 (%)</b> | <b>C (%)</b> | <b>χ<sup>2</sup></b> |
|---------------|----------------|---------------|----------------|---------------|--------------|----------------------|
| 12            | 3.47           | 75.88         | 1.01           | 10.73         | 10.72        | 1.19                 |
| 18            | 3.45           | 81.34         | 0.89           | 9.40          | 9.27         | 1.29                 |
| 24            | 3.42           | 84.90         | 0.82           | 6.30          | 8.80         | 1.20                 |
| 29            | 3.41           | 86.69         | 0.96           | 5.31          | 8.00         | 1.21                 |
| 35            | 3.35           | 89.23         | 0.95           | 3.01          | 7.75         | 1.23                 |
| 39            | 3.33           | 90.74         | 1.16           | 3.06          | 6.21         | 1.18                 |
| 46            | 3.22           | 92.52         | 0.88           | 2.09          | 5.38         | 1.15                 |
| 53            | 3.11           | 94.46         | -              | -             | 5.54         | 1.18                 |

**Table S6.** RB Parameters recovered from Fluorescence Intensity Decay fitting.

| <b>T (°C)</b> | <b>T1 (ns)</b> | <b>B1 (%)</b> | <b>T2 (ns)</b> | <b>B2 (%)</b> | <b>C (%)</b> | <b>χ<sup>2</sup></b> |
|---------------|----------------|---------------|----------------|---------------|--------------|----------------------|
| 12            | 2.25           | 87.51         | 0.59           | 8.73          | 3.76         | 1.07                 |
| 18            | 1.93           | 88.01         | 0.48           | 8.04          | 3.94         | 0.98                 |
| 24            | 1.56           | 88.30         | 0.35           | 6.73          | 4.97         | 1.19                 |
| 29            | 1.39           | 87.98         | 0.33           | 5.88          | 6.14         | 1.01                 |
| 35            | 1.15           | 87.13         | 0.27           | 6.85          | 6.02         | 1.24                 |
| 39            | 1.06           | 82.52         | 0.43           | 9.18          | 8.30         | 1.21                 |
| 46            | 0.90           | 68.53         | 0.47           | 19.91         | 11.57        | 1.09                 |
| 53            | 1.13           | 7.51          | 0.65           | 79.36         | 13.14        | 1.25                 |

**Table S7.** Anisotropy Fitting Results for R6G-Silicate Complex.

| <b>T (°C)</b> | <b>Φ (ns)</b> | <b>R0</b> | <b>χ<sup>2</sup></b> |
|---------------|---------------|-----------|----------------------|
| 12            | 1.17          | 0.17      | 1.11                 |
| 18            | 0.76          | 0.13      | 1.06                 |
| 24            | 0.82          | 0.10      | 1.09                 |
| 29            | 0.51          | 0.15      | 1.05                 |
| 35            | 0.44          | 0.17      | 1.14                 |
| 39            | 0.32          | 0.22      | 1.05                 |
| 46            | 0.18          | 0.34      | 1.10                 |
| 53            | 0.22          | 0.25      | 1.05                 |

**Table S8.** Anisotropy Fitting Results for RhB in Sodium Silicate.

| <b>T (°C)</b> | <b>Φ (ns)</b> | <b>R0</b> | <b>χ<sup>2</sup></b> |
|---------------|---------------|-----------|----------------------|
| 12            | 0.72          | 0.17      | 1.15                 |
| 18            | 0.53          | 0.17      | 1.12                 |
| 24            | 0.54          | 0.12      | 1.10                 |
| 29            | 0.37          | 0.13      | 1.12                 |
| 35            | 0.23          | 0.12      | 1.16                 |
| 39            | 0.29          | 0.11      | 1.15                 |
| 46            | 0.19          | 0.10      | 1.18                 |
| 53            | 0.14          | 0.09      | 1.16                 |
